# Supplementary material
Source: publisher site journal article supplement (https://www.spandidos-publications.com/7744/downloadSupplementary)

Figure S1. Immunohistochemistry images. Strong positivity was encountered for (A) estrogen receptor, (B) human epidermal growth factor receptor 2 and (C) progesterone receptor. Minimally positive or negative staining was encountered for (D) Ki-67, (E) Wilms' tumor gene 1 and (F) P53 (scale bars, 50  $\mu$ m).

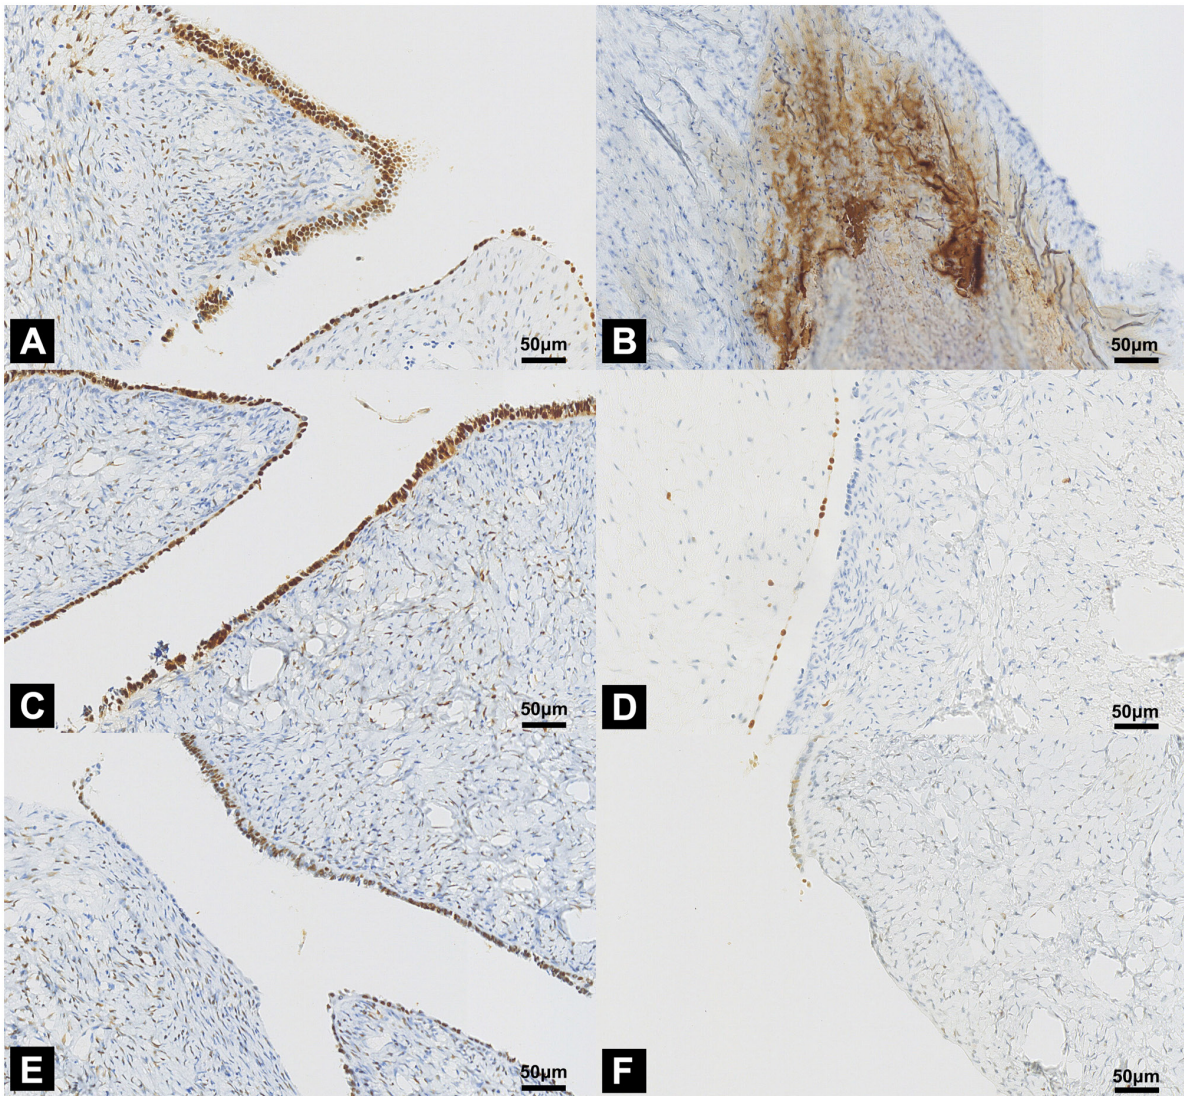

Supplement: Supplementary file 1 [file downloadSupplementary]
